# Supplementary material for: Revealing bactericidal events on graphene oxide nano films deposited on metal implant surfaces
Source: Royal Society of Chemistry journal article supplement (doi:10.1039/d3tb01854g), 2023-12-01
Supplement: d3tb01854g1.pdf [file d3tb01854g1.pdf]

Supplementary materials caption:

Figure S1:

The process line involves the coating of graphene oxide (GO) onto an SS316L substrate through a sequence containing silanization followed by dip coating. This process involves the initial treatment of the SS316L substrate through silanization, a method generating the chemical bonding of a silane compound to the substrate's surface. Subsequently, the treated substrate is immersed into a solution containing the graphene oxide, facilitating the coating of the GO onto the silanized SS316L surface.

Figure S2:

Evaluation of the thickness of the GO coatings on SS316L substrates conducted using the focus ion beam and scanning transmission electron microscope (FIB and STEM, respectively) measurements. The measurements revealed a uniformly distributed thickness of the coating, as independent measurements (at different points) detected comparable coating thicknesses (app. 60-70 nm). The scale bar corresponds to 0,5  $\mu\text{m}$ . Additionally, these values correlate with those obtained through AFM measurements. (Scale bar corresponds to 500 nm).

Table S1:

Chemical composition analysis of the surface modified SS316L substrates with GO, assessed through XPS narrow scan spectra.

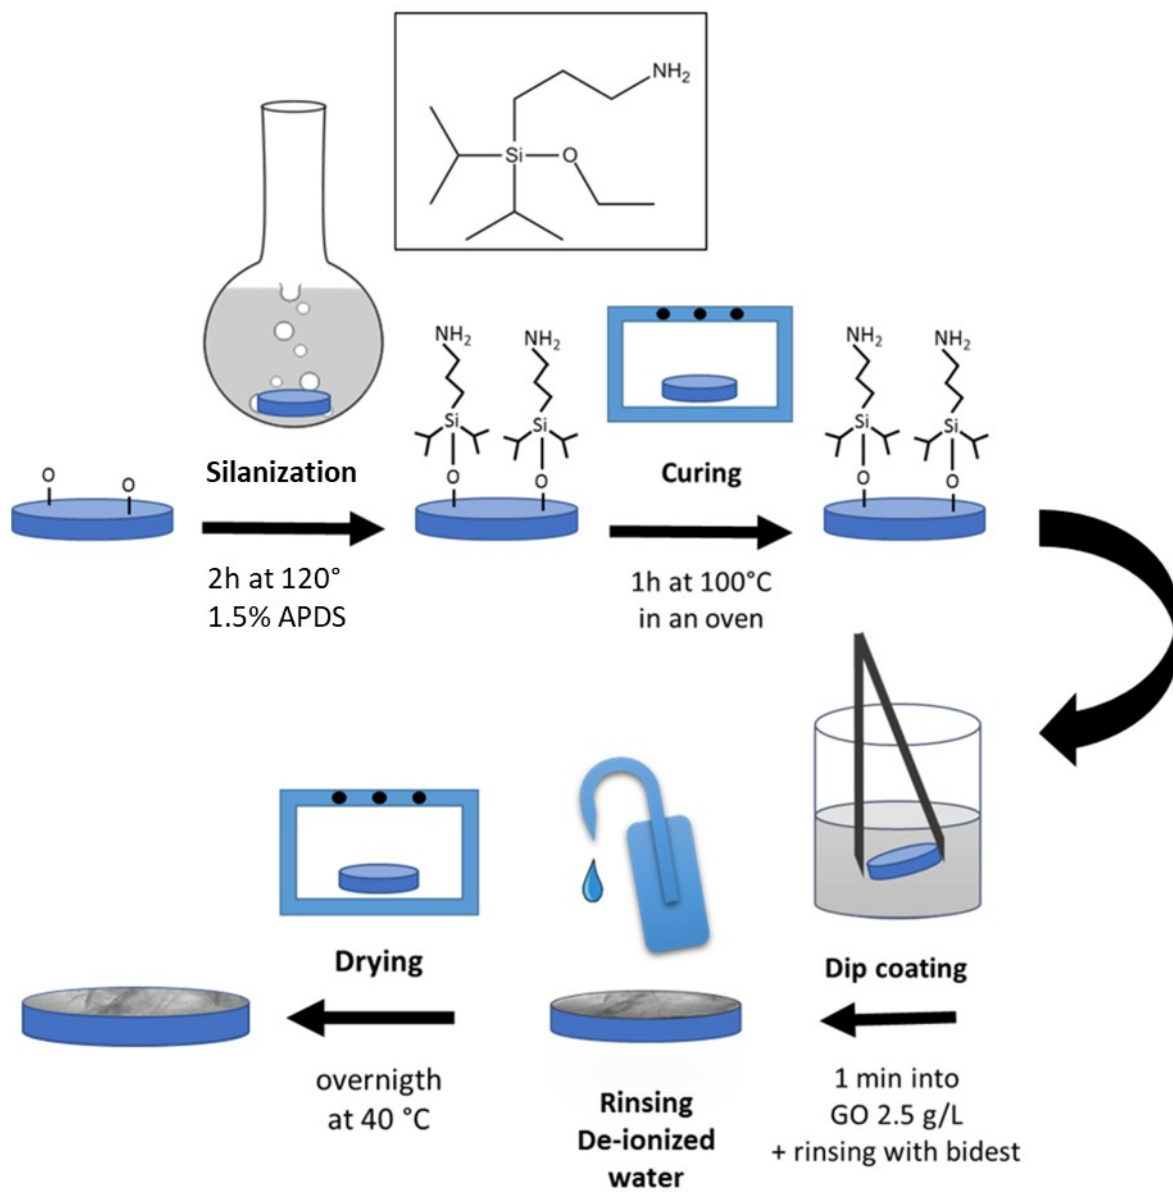

Figure S1.

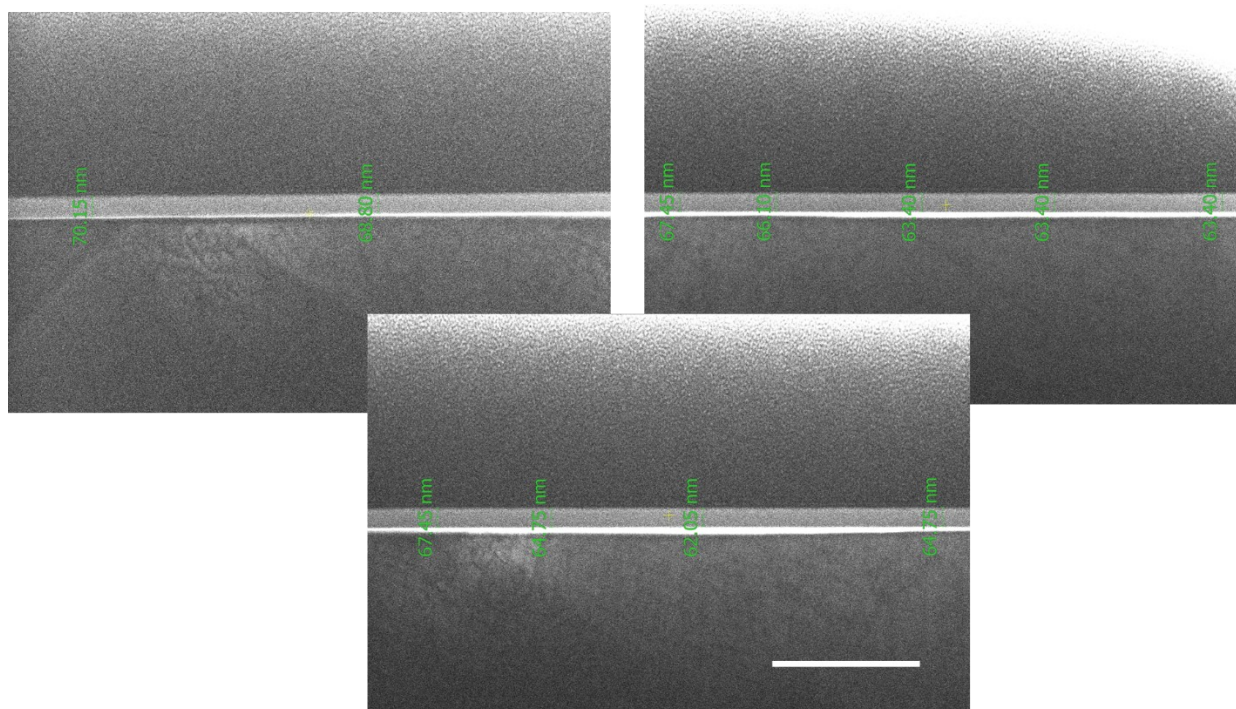

Figure S2.

Table S1.

| sample           | C 1s % | O 1s % | Si 2p % |
|------------------|--------|--------|---------|
| SS316L+GO        | 58.8   | 39.0   | 2.2     |
| SS316L salinized | 38.8   | 56.0   | 5.2     |
| SS316L           | 39.7   | 58.4   | 1.9     |
